# Supplementary material for: Hydrolysis and alcoholysis of polysaccharides with high efficiency catalyzed by a (C16TA)xH6−xP2W18O62 nanoassembly
Source: Royal Society of Chemistry journal article supplement (doi:10.1039/c5ra15047g), 2015-01-01
Supplement: c5ra15047g1.pdf [file c5ra15047g1.pdf]

## Supporting information

### Figure Caption

**Fig. S1** The IR spectra of the  $(C_{16}TA)_nH_{6-n}P_2W_{18}O_{62}$ : (a)  $(C_{16}TA)H_5P_2W_{18}O_{62}$ ; (b)  $(C_{16}TA)_2H_4P_2W_{18}O_{62}$ ; (c)  $(C_{16}TA)_3H_3P_2W_{18}O_{62}$ ; (d)  $(C_{16}TA)_4H_2P_2W_{18}O_{62}$ ; (e)  $(C_{16}TA)_5HP_2W_{18}O_{62}$ ; and (f)  $(C_{16}TA)_6P_2W_{18}O_{62}$

**Fig. S2**  $^{31}P$  MAS NMR spectra of (a)  $(C_{16}TA)H_5P_2W_{18}O_{62}$ , (b)  $(C_{16}TA)_3H_3P_2W_{18}O_{62}$ , (c)  $(C_{16}TA)_6P_2W_{18}O_{62}$  and (d) after the reaction.

**Fig. S3** XRD patterns of  $H_6P_2W_{18}O_{62}$  (a) and  $(C_{16}TA)H_5P_2W_{18}O_{62}$  (b).

**Fig. S4** The conductivity of  $(C_{16}TA)_nH_{6-n}P_2W_{18}O_{62}$  at the room temperature. (a)  $(C_{16}TA)H_5P_2W_{18}O_{62}$ , (b)  $(C_{16}TA)_2H_4P_2W_{18}O_{62}$ , (c)  $(C_{16}TA)_3H_3P_2W_{18}O_{62}$ , (d)  $(C_{16}TA)_4H_2P_2W_{18}O_{62}$ , (e)  $(C_{16}TA)_5HP_2W_{18}O_{62}$ , (f)  $(C_{16}TA)_6P_2W_{18}O_{62}$ .

**Fig. S5** The TEM and EDAX of the  $(C_{16}TA)H_5P_2W_{18}O_{62}$

**Fig. S6** The IR spectra of  $(C_{16}TA)H_5P_2W_{18}O_{62}$  adsorbing cellulose(left) and  $(C_{16}TA)H_2PW_{12}O_{40}$  adsorbing cellulose (right)

**Fig. S7** The IR spectra of the  $(C_{16}TA)H_5P_2W_{18}O_{62}$  before (a) and after the reaction (b)

**Table S1** Hydrolysis of cellulose comparison with recently reported chemical procedures.

**Table S2** The elemental analysis of  $(C_{16}TA)_nH_{6-n}P_2W_{18}O_{62}$  and acid contents.

**Table S3** Voltammetric Data for heteropolytungstates using a wax-Impregnated graphite electrode.

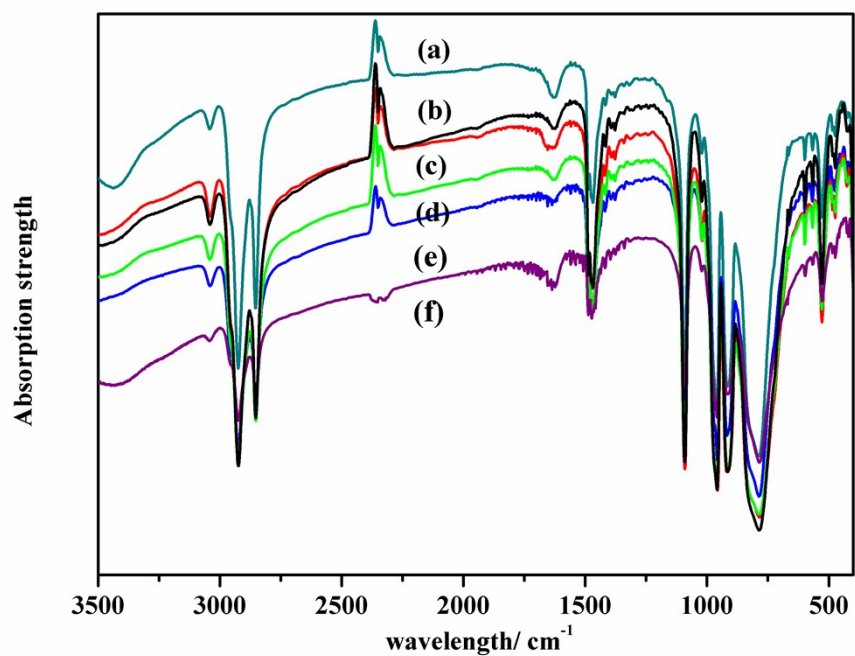

**Fig. S1** The IR spectra of the  $(C_{16}TA)_nH_{6-n}P_2W_{18}O_{62}$ : (a)  $(C_{16}TA)H_5P_2W_{18}O_{62}$ ; (b)  $(C_{16}TA)_2H_4P_2W_{18}O_{62}$ ; (c)  $(C_{16}TA)_3H_3P_2W_{18}O_{62}$ ; (d)  $(C_{16}TA)_4H_2P_2W_{18}O_{62}$ ; (e)  $(C_{16}TA)_5HP_2W_{18}O_{62}$ ; and (f)  $(C_{16}TA)_6P_2W_{18}O_{62}$

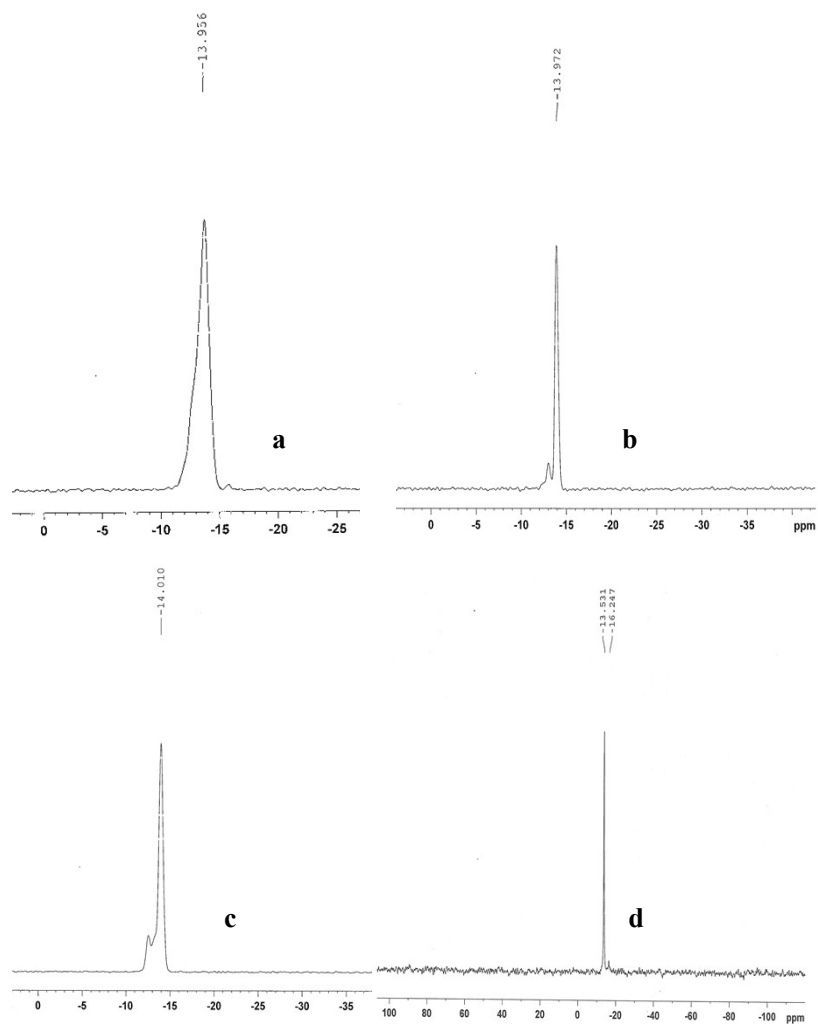

**Fig. S2**  $^{31}\text{P}$  MAS NMR spectra of (a)  $(\text{C}_{16}\text{TA})\text{H}_5\text{P}_2\text{W}_{18}\text{O}_{62}$ , (b)  $(\text{C}_{16}\text{TA})_3\text{H}_3\text{P}_2\text{W}_{18}\text{O}_{62}$ , (c)  $(\text{C}_{16}\text{TA})_6\text{P}_2\text{W}_{18}\text{O}_{62}$  and (d) after the reaction.

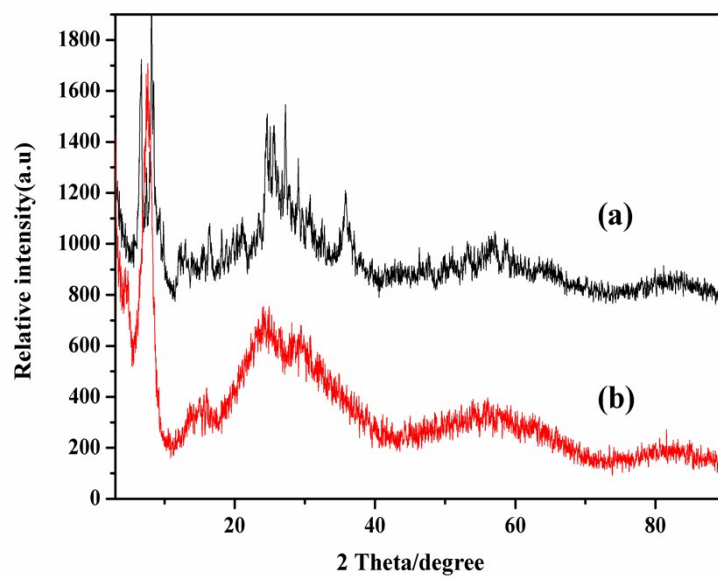

**Fig. S3** XRD patterns of  $\text{H}_6\text{P}_2\text{W}_{18}\text{O}_{62}$  (a) and  $(\text{C}_{16}\text{TA})\text{H}_5\text{P}_2\text{W}_{18}\text{O}_{62}$  (b).

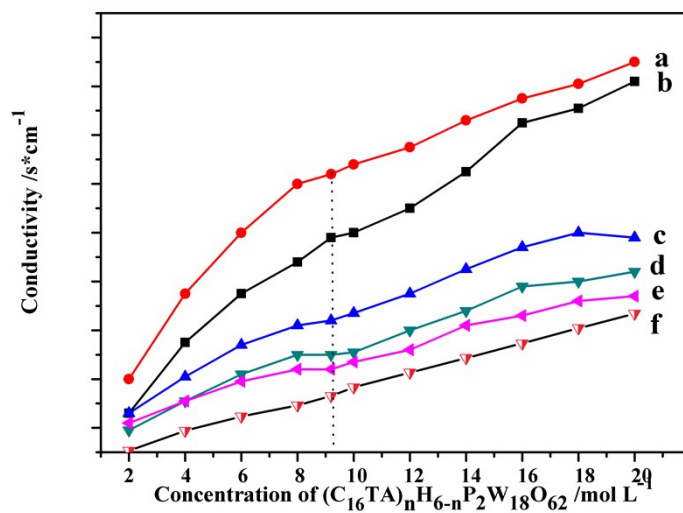

**Fig. S4** The conductivity of  $(C_{16}TA)_nH_{6-n}P_2W_{18}O_{62}$  at the room temperature. (a)  $(C_{16}TA)H_3P_2W_{18}O_{62}$ , (b)  $(C_{16}TA)_2H_4P_2W_{18}O_{62}$ , (c)  $(C_{16}TA)_3H_3P_2W_{18}O_{62}$ , (d)  $(C_{16}TA)_4H_2P_2W_{18}O_{62}$ , (e)  $(C_{16}TA)_5HP_2W_{18}O_{62}$ , (f)  $(C_{16}TA)_6P_2W_{18}O_{62}$ .

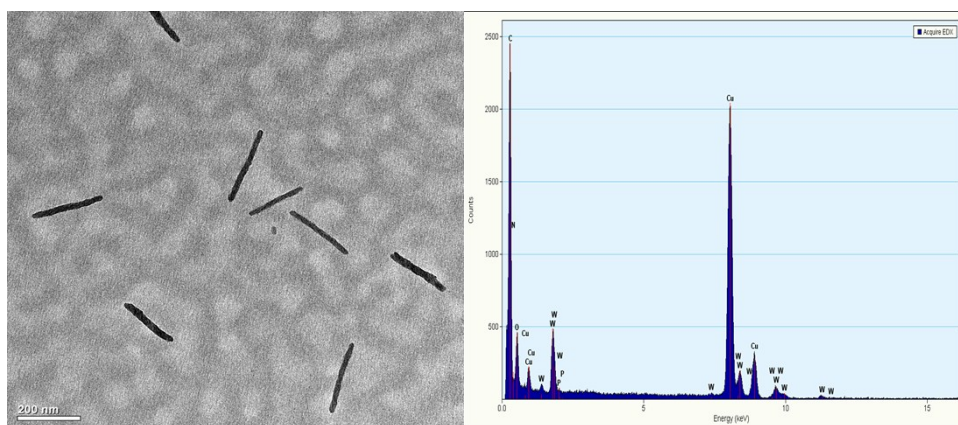

**Fig. S5** The TEM and EDX of the  $(C_{16}TA)H_5P_2W_{18}O_{62}$

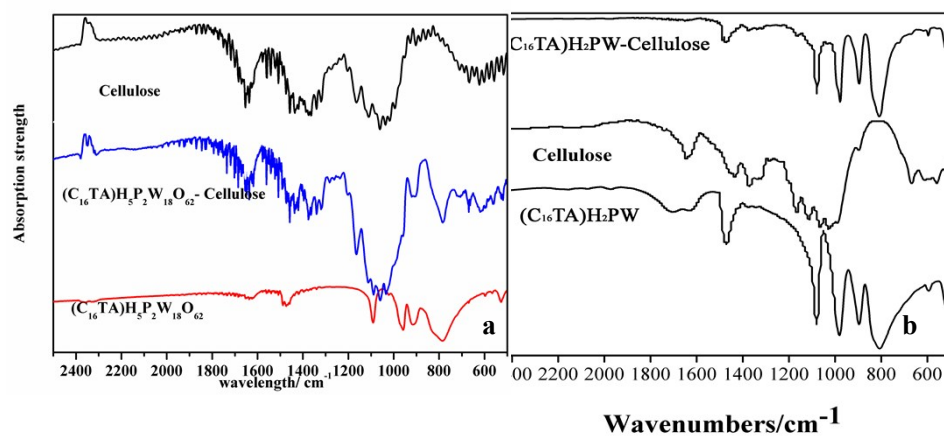

**Fig. S6** The IR spectra of (C<sub>16</sub>TA)H<sub>5</sub>P<sub>2</sub>W<sub>18</sub>O<sub>62</sub> adsorbing cellulose(left) and (C<sub>16</sub>TA) H<sub>2</sub>PW<sub>12</sub>O<sub>40</sub> adsorbing cellulose (right)

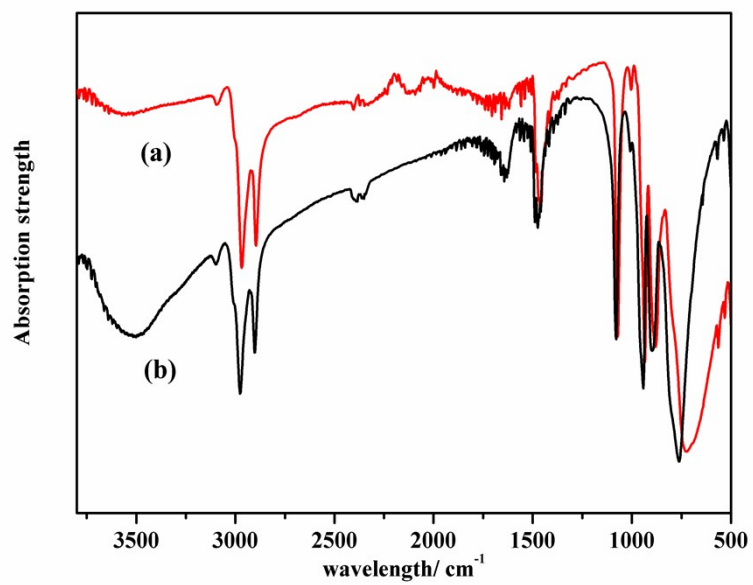

**Fig. S7** The IR spectra of the  $(C_{16}TA)H_3P_2W_{18}O_{62}$  before (a) and after the reaction (b)



**Table S1** Hydrolysis of cellulose comparison with recently reported chemical procedures.

| Catalyst                                                                        | Solvents                                | Temp.<br>(K) | Time<br>(h) | Glucose yield<br>(%) | Ref.      |
|---------------------------------------------------------------------------------|-----------------------------------------|--------------|-------------|----------------------|-----------|
| HNbMoO <sub>6</sub>                                                             | H <sub>2</sub> O                        | 403          | 12          | 8.5                  | 1         |
| Zn–Ca–Fe                                                                        | H <sub>2</sub> O                        | 433          | 20          | 29                   | 2         |
| Amberlyst–15                                                                    | [BMIm]Cl/H <sub>2</sub> O               | 373          | 5           | 11                   | 3         |
| CP–SO <sub>3</sub> H                                                            | H <sub>2</sub> O                        | 393          | 10          | 93                   | 4         |
| Nafion NR50                                                                     | H <sub>2</sub> O                        | 403          | 2           | 35                   | 5         |
| Nafion SAC50                                                                    | H <sub>2</sub> O                        | 463          | 24          | 11                   | 6         |
| PCPs–SO <sub>3</sub> H                                                          | H <sub>2</sub> O                        | 393          | 3           | 5.3                  | 7         |
| AC–SO <sub>3</sub> H                                                            | H <sub>2</sub> O                        | 373          | 3           | 64                   | 8         |
| BC–SO <sub>3</sub> H                                                            | H <sub>2</sub> O                        | 363(MW)      | 1           | 19.8                 | 9         |
| CSA–SO <sub>3</sub> H <sup>b</sup>                                              | H <sub>2</sub> O                        | 403(MW)      | 1           | 34.6                 | 10        |
| SC–SO <sub>3</sub> H                                                            | [BMIm]Cl/H <sub>2</sub> O               | 383          | 4           | 63                   | 11        |
| AC–N–SO <sub>3</sub> H–250                                                      | H <sub>2</sub> O                        | 423          | 24          | 62.6                 | 12        |
| CMK–3–SO <sub>3</sub> H                                                         | H <sub>2</sub> O                        | 423          | 24          | 74.5                 | 12        |
| SimCn–SO <sub>3</sub> H                                                         | H <sub>2</sub> O                        | 423          | 24          | 50.4                 | 13        |
| H <sub>3</sub> PW <sub>12</sub> O <sub>40</sub>                                 | H <sub>2</sub> O                        | 423          | 2           | 18                   | 14        |
| H <sub>3</sub> PW <sub>12</sub> O <sub>40</sub>                                 | H <sub>2</sub> O                        | 453          | 2           | 50.5                 | 15        |
| H <sub>5</sub> BW <sub>12</sub> O <sub>40</sub>                                 | H <sub>2</sub> O                        | 333          | 6           | 77                   | 16        |
| H <sub>3</sub> PW <sub>12</sub> O <sub>40</sub>                                 | H <sub>2</sub> O                        | 363(MW)      | 3           | 75.6                 | 17        |
| Micellar HPA                                                                    | H <sub>2</sub> O                        | 443          | 8           | 39.3                 | 18        |
| [MIMPSH] <sub>n</sub> H <sub>3–n</sub> PW                                       | H <sub>2</sub> O/MIBK                   | 413          | 5           | 36                   | 19        |
| CsH <sub>2</sub> PW <sub>12</sub> O <sub>40</sub>                               | H <sub>2</sub> O                        | 433          | 6           | 27                   | 20        |
| H-beta                                                                          | H <sub>2</sub> O                        | 423          | 24          | 12                   | 21        |
| HY zeolite                                                                      | [C <sub>4</sub> mim]Cl/H <sub>2</sub> O | 373(MW)      | 0.13        | 37                   | 22        |
| HY zeolite                                                                      | [BMIm]Cl/H <sub>2</sub> O               | 403          | 2           | 50                   | 23        |
| Fe <sub>3</sub> O <sub>4</sub> –SBA–SO <sub>3</sub> H                           | H <sub>2</sub> O                        | 423          | 3           | 26                   | 24        |
| Fe <sub>3</sub> O <sub>4</sub> –SBA–SO <sub>3</sub> H                           | H <sub>2</sub> O                        | 423          | 3           | 50                   | 25        |
| MNPs@SiO <sub>2</sub> –SO <sub>3</sub> H                                        | H <sub>2</sub> O                        | 423          | 3           | 30.2                 | 26        |
| Ru/CMK–3                                                                        | H <sub>2</sub> O                        | 503          | 24          | 34.2                 | 27        |
| CaFe <sub>2</sub> O <sub>4</sub>                                                | H <sub>2</sub> O                        | 423          | 24          | 36                   | 28        |
| HT–OH <sub>Ca</sub>                                                             | H <sub>2</sub> O                        | 423          | 24          | 40.7                 | 29        |
| AC–SO <sub>3</sub> H                                                            | H <sub>2</sub> O                        | 423          | 12          | 42.5                 | 30        |
| PDVB–SO <sub>3</sub> H–[C <sub>3</sub> vim]– [SO <sub>3</sub> CF <sub>3</sub> ] | [C <sub>4</sub> mim]Cl/H <sub>2</sub> O | 373          | 5           | 77.0                 | 31        |
| PVP–HPW                                                                         | Butanol                                 | 433          | 4           | 61.6 $\alpha$ -BGS   | 32        |
| PVP–HSiW (1/5 : 3/4)                                                            |                                         | 433          | 4           | 60.8 $\alpha$ -BGS   |           |
| K26, HCl                                                                        | H <sub>2</sub> O                        | 453          | 1           | 88                   | 33        |
| K26                                                                             |                                         |              | 1           | 36                   |           |
| Cp–SO <sub>3</sub> H–1.69                                                       | H <sub>2</sub> O                        | 443          | 10          | 2.1                  | 34        |
| NbP                                                                             | H <sub>2</sub> O                        | 453(MW)      | 0.25        | 22                   | 35        |
| (CTA)H <sub>5</sub> P <sub>2</sub> W <sub>18</sub> O <sub>64</sub>              | H <sub>2</sub> O                        | 433          | 9           | 69.1                 | This work |
| (CTA)H <sub>5</sub> P <sub>2</sub> W <sub>18</sub> O <sub>64</sub>              | methanol                                | 433          | 7           | 58.5MLA              | This work |

**Table S2** The elemental analysis of  $(C_{16}TA)_nH_{6-n}P_2W_{18}O_{62}$  and acid contents

| Catalysts                                     | Elementary results (experiment value in parenthesis)/% |              |            |            |              | Acid content<br>[mol·kg <sup>-1</sup> ] |
|-----------------------------------------------|--------------------------------------------------------|--------------|------------|------------|--------------|-----------------------------------------|
|                                               | H                                                      | C            | N          | P          | W            |                                         |
| $[C_{16}H_{33}N(CH_3)_3]_1H_5P_2W_{18}O_{62}$ | 1.02(1.10)                                             | 4.90(4.81)   | 0.30(0.29) | 1.33(1.21) | 71.12(71.45) | 3.2                                     |
| $[C_{16}H_{33}N(CH_3)_3]_2H_4P_2W_{18}O_{62}$ | 1.80(1.64)                                             | 9.25(8.43)   | 0.57(0.49) | 1.26(1.22) | 67.04(67.97) | 2.8                                     |
| $[C_{16}H_{33}N(CH_3)_3]_3H_3P_2W_{18}O_{62}$ | 2.49(2.52)                                             | 13.12(14.56) | 0.81(0.76) | 1.19(1.22) | 63.40(62.70) | 2.1                                     |
| $[C_{16}H_{33}N(CH_3)_3]_4H_2P_2W_{18}O_{62}$ | 3.11(3.28)                                             | 16.59(15.44) | 1.02(0.83) | 1.13(1.31) | 60.13(60.68) | 1.5                                     |
| $[C_{16}H_{33}N(CH_3)_3]_5HP_2W_{18}O_{62}$   | 3.68(3.53)                                             | 19.72(18.26) | 1.21(1.09) | 1.07(1.24) | 57.18(59.70) | 1.1                                     |
| $[C_{16}H_{33}N(CH_3)_3]_6P_2W_{18}O_{62}$    | 4.18(4.10)                                             | 22.56(23.50) | 1.38(1.29) | 1.02(1.17) | 54.51(54.69) | 0.6                                     |

**Table S3** Voltammetric data<sup>a</sup> for heteropolytungstates using a wax-impregnated graphite electrode

| Anion                                                        | Medium                             | E <sub>pa</sub><br>(V) | E <sub>pc</sub><br>(V) | Amount<br>(mmol) | P <sub>O<sub>2</sub></sub><br>(MPa) | Conversion<br>(%) | Yield<br>(%)      |
|--------------------------------------------------------------|------------------------------------|------------------------|------------------------|------------------|-------------------------------------|-------------------|-------------------|
| PW <sub>12</sub> O <sub>40</sub> <sup>-3</sup>               | 1 M H <sub>2</sub> SO <sub>4</sub> | -0.04                  | -0.10                  | 0.07             | 1.0                                 | 41.2              | 28.2 <sup>b</sup> |
|                                                              |                                    | -0.30                  | -0.36                  |                  |                                     | 51.8              | 29.1 <sup>c</sup> |
| P <sub>2</sub> W <sub>18</sub> O <sub>62</sub> <sup>-6</sup> | pH=5                               | 0.02                   | -0.05                  | 0.07             | 1.0                                 | 66.1              | 29.9 <sup>b</sup> |
|                                                              |                                    | -0.16                  | -0.22                  |                  |                                     | 91.2              | 21.1 <sup>c</sup> |
|                                                              |                                    | -0.55                  | -0.61                  |                  |                                     |                   |                   |
|                                                              |                                    | -0.68                  | -0.75                  |                  |                                     |                   |                   |

<sup>a</sup>Anion concentration 1.0 mM; sweep rate 0.5 V min<sup>-1</sup>; all reductions are one-electron processes.

<sup>b</sup> Reaction condition: 100 mg of cellulose, 5 mL water at 160 °C in 3 h and in O<sub>2</sub> for 10 min.

<sup>c</sup> Reaction condition: 100 mg of cellulose, 5 mL water at 160 °C in 3 h and in O<sub>2</sub> for 30 min.

## References

- 1 A. Takagaki, C. Tagusagawa, K. Domen, *Chem. Commun.*, 2008, 5363.
- 2 F. Zhang, X. Deng, Z. Fang, H. Zeng, X. Tian, J. Kozinski, *Petrochem. Technol.*, 2011, 40, 43.
- 3 R. Rinaldi, R. Palkovits and F. Schüth, *Angew. Chem., Int. Ed.*, 2008, 47, 8047.
- 4 L. Shuai, Q. Yang, J. Y. Zhu, F. C. Lu, P. J. Weimer, J. Ralph, X. J. Pan, *Bioresour. Technol.*, 2010, 101, 3106.
- 5 L. Shuai and X. Pan, *Energy Environ. Sci.*, 2012, 5, 6889.
- 6 S. Suganuma, K. Nakajima, M. Kitano, D. Yamaguchi, H. Kato, S. Hayashi, M. Hara, *J. Am. Chem. Soc.*, 2008, 130, 12787.
- 7 S. Kim, A. A. Dwiatmoko, J. W. Choi, Y. Suh, D. J. Suh, M. Oh, *Bioresour. Technol.*, 2010, 101, 8273.
- 8 J. Hegner, K. C. Pereira, B. DeBoef, B. L. Lucht, *Tetrahedron Lett.*, 2010, 51, 2356.
- 9 G. Akiyama, R. Matsuda, H. Sato, M. Takata, S. Kitagawa, *Adv. Mater.*, 2011, 23, 3294.
- 10 Y. Wu, Z. Fu, D. Yin, Q. Xu, F. Liu, C. Lu, L. Mao, *Green Chem.*, 2010, 12, 696.
- 11 Y. Jiang, X. Li, X. Wang, L. Meng, H. Wang, G. Peng, X. Wang, X. Mu, *Green Chem.*, 2012, 14, 2162.
- 12 H. Guo, X. Qi, L. Li, R. L. Smith Jr., *Bioresour. Technol.*, 2012, 116, 355.
- 13 J. Pang, A. Wang, M. Zheng, T. Zhang, *Chem. Commun.*, 2010, 46, 6935.
- 14 S. V. de Vyver, L. Peng, J. Geboers, H. Schepers, F. de Clippel, C. J. Gomme, B. Goderis, P. A. Jacobs, B. F. Sels, *Green Chem.*, 2010, 12, 1560.
- 15 K. Shimizu, H. Furukawa, N. Kobayashi, Y. Itayab, A. Satsuma, *Green Chem.*, 2009, 11, 1627.
- 16 J. Tian, J. Wang, S. Zhao, C. Jiang, X. Zhang, X. Wang, *Cellulose*, 2010, 17, 587.
- 17 Y. Ogasawara, S. Itagaki, K. Yamaguchi, N. Mizuno, *ChemSusChem*, 2011, 4, 519.
- 18 X. Li, Y. Jiang, L. Wang, L. Meng, W. Wang, X. Mu, *RSC Adv.*, 2012, 2, 6921.
- 19 M. Chenga, T. Shia, H. Guana, S. Wang, X. Wang, Z. Jiang, *Appl. Catal., B*, 2011, 107, 104.
- 20 Z. Sun, M. Cheng, H. Li, T. Shi, M. Yuan, X. Wang, Z. Jiang, *RSC Adv.*, 2012, 2, 9058.
- 21 J. Tian, C. Fan, M. Cheng and X. Wang, *Chem. Eng. Technol.*, 2011, 34, 482.
- 22 A. Onda, T. Ochi, K. Yanagisawa, *Green Chem.*, 2008, 10, 1033.
- 23 Z. Zhang, Z. K. Zhao, *Carbohydr. Res.*, 2009, 344, 2069.
- 24 H. Caia, C. Li, A. Wang, G. Xua, T. Zhang, *Appl. Catal., B*, 2012, 123-124, 333.
- 25 D. Lai, L. Deng, Q. Guo, Y. Fu, *Energy Environ. Sci.*, 2011, 4, 3552.
- 26 A. Takagaki, M. Nishimura, S. Nishimura, K. Ebitani, *Chem. Lett.*, 2011, 40, 1195.
- 27 H. Kobayashi, T. Komanoya, K. Hara and A. Fukuoka, *ChemSusChem*, 2010, 3, 440.
- 28 T. Komanoya, H. Kobayashi, K. Hara, W. J. Chun, A. Fukuoka, *Appl. Catal. A. Gen.*, 2011, 407, 188.
- 29 F. Zhang and Z. Fang, *Bioresour. Technol.*, 2012, 124, 440.
- 30 H. T. Vo, V.T. Widyaya, J. Jae, H. S. Kim, H. Lee, *Bioresour. Technol.*, 2014, 167, 484.
- 31 F.J. Liu, R. K. Kamat, I. Noshadi, D. Peck, R. S. Parnas, A. Zheng, C.Z. Qi, Y. Lin, *Chem. Commun.*, 2013, 49, 8456.
- 32 J. Chen, X.L. Fang, X.P. Duan, L.M. Ye, H.Q. Lin, Y.Z. Yuan, *Green Chem.*, 2014, 16, 294.
- 33 H. Kobayashi, M. Yabushita, T. Komanoya, K. Hara, I. Fujita, A. Fukuoka, *ACS Catal.* 2013, 3, 581-587.
- 34 Yong Zuo, Ying Zhang, Yao Fu, *ChemCatChem* 2014, 6, 753 – 757

35 Hilda Gómez Bernal, Luca Bernazzani, Anna Maria Raspolli Gallett, *Green Chem.* 2014,16, 3734-3740
